# Supplementary material for: Modelling the cost-effectiveness of introducing subsidised malaria rapid diagnostic tests in the private retail sector in sub-Saharan Africa
Source: PubMed Central journal article supplement (PMC7247415; doi:10.1136/bmjgh-2019-002138), 2020-05-20
Supplement: bmjgh-2019-002138supp001.pdf [file bmjgh-2019-002138supp001.pdf]

SUPPLEMENTARY FILE

**S1. Decision tree model structure for patient with an uncomplicated febrile illness without obvious cause; (a) diagnosis, test result, and initial treatment, and (b) treatment effectiveness, disease progression and further care, and final health outcome \***

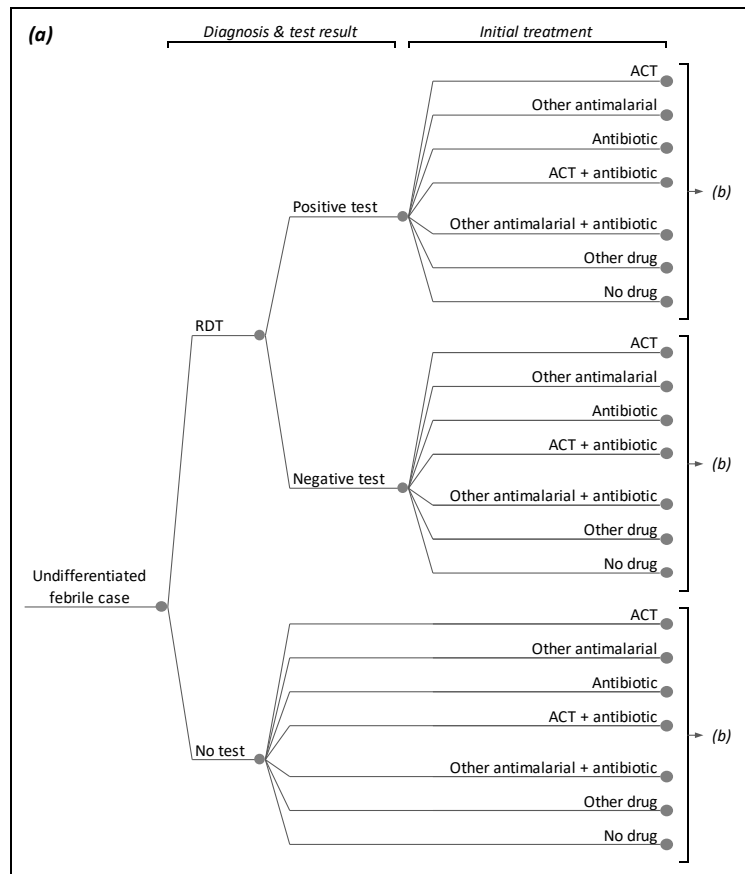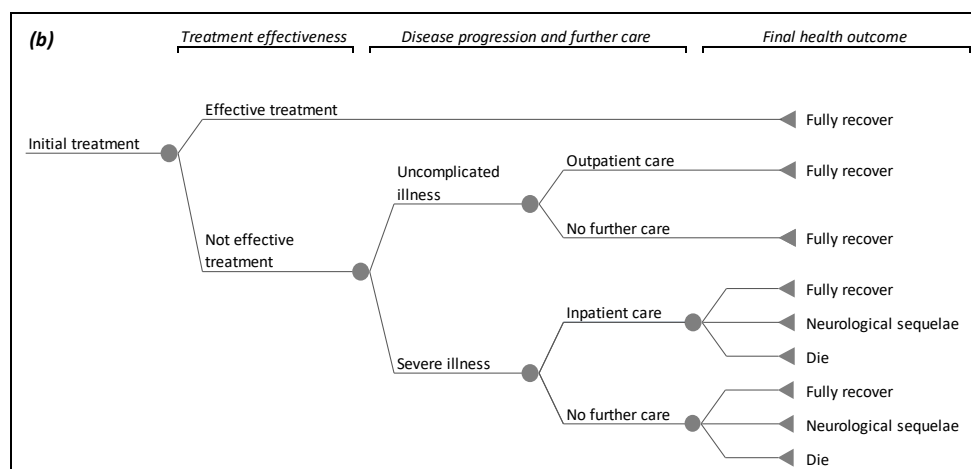

\* Replicated for each of the four true underlying diagnoses modelled (malaria, bacterial infection, malaria and bacterial co-infection, and viral).

**S2. Other cost-effectiveness model parameters**

| Parameter                                                                                                   | Value (Range for PSA)        |                               | Distribution for PSA | Source(s)                                                                                                              |
|-------------------------------------------------------------------------------------------------------------|------------------------------|-------------------------------|----------------------|------------------------------------------------------------------------------------------------------------------------|
| Inflation rate                                                                                              | 6.8%                         |                               | Point estimate       | Median of 6 country (Ghana, Kenya, Madagascar, Nigeria, Tanzania, Uganda) GDP deflator (5 year average, 2012-2017)(69) |
| Discount rate                                                                                               | 3.0%                         |                               | Point estimate       | (44)                                                                                                                   |
| ACT efficacy (for malaria and bacterial co-infection)                                                       | 0.05 (0.00-0.10)             |                               | Beta                 | Assumption                                                                                                             |
| Other antimalarial efficacy (for malaria and bacterial co-infection)                                        | 0.05 (0.00-0.10)             |                               | Beta                 | Assumption                                                                                                             |
| ACT + antibiotic efficacy (for malaria and bacterial co-infection)                                          | 0.85 (0.765-0.935)           |                               | Beta                 | Assumption                                                                                                             |
| Other antimalarial efficacy (for malaria and bacterial co-infection)                                        | 0.60 (0.15-0.80)             |                               | Beta                 | Assumption                                                                                                             |
| Antibiotic efficacy (for malaria and bacterial co-infection)                                                | 0.05 (0.00-0.10)             |                               | Beta                 | Assumption                                                                                                             |
| Proportion of bacterial cases in low HIV setting                                                            | 0.50 (0.00-1.00)             |                               | Uniform              | Assumption                                                                                                             |
| Malaria and bacterial co-infection case progresses to severe with no (or not effective) treatment           |                              |                               |                      | Assumption: same as for bacterial infection                                                                            |
| <5 years                                                                                                    | Low HIV:<br>0.20 (0.05-0.80) | High HIV:<br>0.40 (0.15-0.90) | Beta                 |                                                                                                                        |
| 5+ years                                                                                                    | 0.20 (0.05-0.70)             | 0.30 (0.10-0.90)              | Beta                 |                                                                                                                        |
| Uncomplicated patient with no (or not effective) treatment receives further (outpatient) care               | 0.48 (0.36-0.73)             |                               | Beta                 | (20)                                                                                                                   |
| Outpatient care provided in health centre (rather than hospital) setting                                    | 0.68 (0.51-0.93)             |                               | Beta                 | (20)                                                                                                                   |
| Probability of neurological sequelae with severe malaria                                                    |                              |                               |                      | (20)                                                                                                                   |
| <5 years                                                                                                    | 0.035 (0.01-0.05)            |                               | Beta                 |                                                                                                                        |
| 5+ years                                                                                                    | 0.015 (0.01-0.02)            |                               | Beta                 |                                                                                                                        |
| Probability of neurological sequelae with severe bacterial infection, or malaria and bacterial co-infection |                              |                               |                      | (20)                                                                                                                   |
| <5 years                                                                                                    | 0.02 (0.016-0.024)           |                               | Beta                 |                                                                                                                        |
| 5+ years                                                                                                    | 0.038 (0.01-0.07)            |                               | Beta                 |                                                                                                                        |
| CFR of severe malaria and bacterial co-infection receiving inpatient care                                   | 0.10 (0.05-0.15)             |                               | Beta                 | Assumption: same as for severe malaria receiving inpatient care                                                        |

| Parameter                                                                                     | Value (Range for PSA)                                                                                                          | Distribution for PSA | Source(s)                                                                                                                    |
|-----------------------------------------------------------------------------------------------|--------------------------------------------------------------------------------------------------------------------------------|----------------------|------------------------------------------------------------------------------------------------------------------------------|
| CFR of severe malaria and bacterial co-infection with no further care<br><5 years<br>5+ years | Low transmission:<br>0.73 (0.25-0.95)<br>0.70 (0.30-0.95)<br>Medium/high transmission:<br>0.45 (0.05-0.90)<br>0.60 (0.10-0.90) | Beta<br>Beta         | Assumption: same as for severe malaria with no further care                                                                  |
| RDT freight and insurance (% ex-manufacturer price)                                           | 10%                                                                                                                            | Point estimate       | Assumption                                                                                                                   |
| RDT consumables cost (USD)                                                                    | 0.05 (0.04-0.06)                                                                                                               | Beta                 | Assumption                                                                                                                   |
| RDT mark-up (% ex-manufacturer price)                                                         | 200% (150-250%)                                                                                                                | Uniform              | Assumption                                                                                                                   |
| Child drug cost per dose (% adult cost per dose)                                              | 0.50 (0.375-0.625)                                                                                                             | Beta                 | (20)                                                                                                                         |
| ACT mark-up (% ex-manufacturer price)                                                         | 840% (630-1,050%)                                                                                                              | Gamma                | (14) (+/- 25%)                                                                                                               |
| Other antimalarial ex-manufacturer price (USD)                                                | 0.34 (0.25-0.42)                                                                                                               | Gamma                | (67) (+/- 25%)                                                                                                               |
| Antibiotic (amoxicillin) ex-manufacturer price (USD)                                          | 0.27 (0.25-0.34)                                                                                                               | Gamma                | IMPPG (+/- 25%)                                                                                                              |
| Other drug ex-manufacturer price (USD)                                                        | 0.10 (0.05-0.13)                                                                                                               | Gamma                | Assumption                                                                                                                   |
| Antibiotic and other drug mark-up (% ex-manufacturer price)                                   | 100% (50-100%)                                                                                                                 | Uniform              | Assumption                                                                                                                   |
| Artesunate (inpatient treatment) cost per adult dose, patient recovers (USD)                  | 7.25 (5.44-9.06)                                                                                                               | Gamma                | (67)                                                                                                                         |
| Proportion of artesunate dose received where patient dies                                     | 0.65 (0.55-0.75)                                                                                                               | Beta                 | Based on (20)                                                                                                                |
| Consumables per artesunate dose (USD)                                                         | 0.60 (0.45-0.75)                                                                                                               | Gamma                | Assumption (+/- 25%)                                                                                                         |
| Microscopy diagnoses per inpatient visit                                                      | 2                                                                                                                              | Point estimate       | Assumption                                                                                                                   |
| Average length of inpatient stay (days), patient recovers                                     | 3.0 (2.0-5.0)                                                                                                                  | Gamma                | (42)                                                                                                                         |
| Average length of inpatient stay (days), patient dies                                         | 2.0 (1.5-2.5)                                                                                                                  | Gamma                | (20,43)                                                                                                                      |
| User fees paid by patient (% total inpatient cost)                                            | 0.20 (0.00-0.40)                                                                                                               | Beta                 | Assumption                                                                                                                   |
| Outpatient cost per visit, hospital (excluding treatment costs) (USD)                         | 1.55 (1.35-4.29)                                                                                                               | Gamma                | Median of 6 country (Ghana, Kenya, Madagascar, Nigeria, Tanzania, Uganda) outpatient visit cost, primary hospital(68)        |
| Outpatient cost per visit, health centre * (USD)                                              | 1.13 (0.96-3.05)                                                                                                               | Gamma                | Median of 6 country (Ghana, Kenya, Madagascar, Nigeria, Tanzania, Uganda) outpatient visit cost, health centre (no beds)(68) |
| Microscopy cost, per outpatient presentation (USD)                                            | 0.84 (0.44-1.92)                                                                                                               | Gamma                | (20) (+/- 50%)                                                                                                               |
| Proportion of outpatients presenting to public facility                                       | 0.40 (0.20-0.60)                                                                                                               | Beta                 | Assumption                                                                                                                   |

| Parameter                                      | Value (Range for PSA) | Distribution for PSA | Source(s)                                                                                                   |
|------------------------------------------------|-----------------------|----------------------|-------------------------------------------------------------------------------------------------------------|
| Life expectancy of patient < 5 years (years)   | 63.55 (57.20-69.91)   | Gamma                | (45) (Expectation of life at age 1-4 years, based on previous models(20); mean of male and female values)   |
| Life expectancy of patient > 5 years (years)   | 43.80 (39.42-49.18)   | Gamma                | (45) (Expectation of life at age 25-29 years, based on previous models(20); mean of male and female values) |
| Average duration of uncomplicated fever (days) | 3 (1-7)               | Gamma                | Assumption                                                                                                  |
| Average duration of severe fever (days)        | 14 (7-28)             | Gamma                | Assumption                                                                                                  |
| Disability weight for uncomplicated fever      | 0.051 (0.032-0.074)   | Gamma                | (46) ('Infectious disease acute episode, moderate')                                                         |
| Disability weight for severe fever             | 0.542 (0.374-0.702)   | Gamma                | (46) ('Infectious disease acute episode, severe')                                                           |
| Disability weight for neurological sequelae    | 0.133 (0.088-0.190)   | Gamma                | (46) ('Motor plus cognitive impairments: severe')                                                           |

CFR: case fatality rate. IMPPG: International Medical Products Price Guide (available from [www.mshpriceguide.org](http://www.mshpriceguide.org)).

\* Outpatient cost is bed-day cost only; excludes cost of treatment. All costs were adjusted to 2017 US dollars using the median of the five year annual average GDP deflator in the six countries participating in the Private Sector Co-payment Mechanism(69).

**S3. True underlying diagnosis of fever of population (100,000 febrile patients) at 5% and 50% PfPR**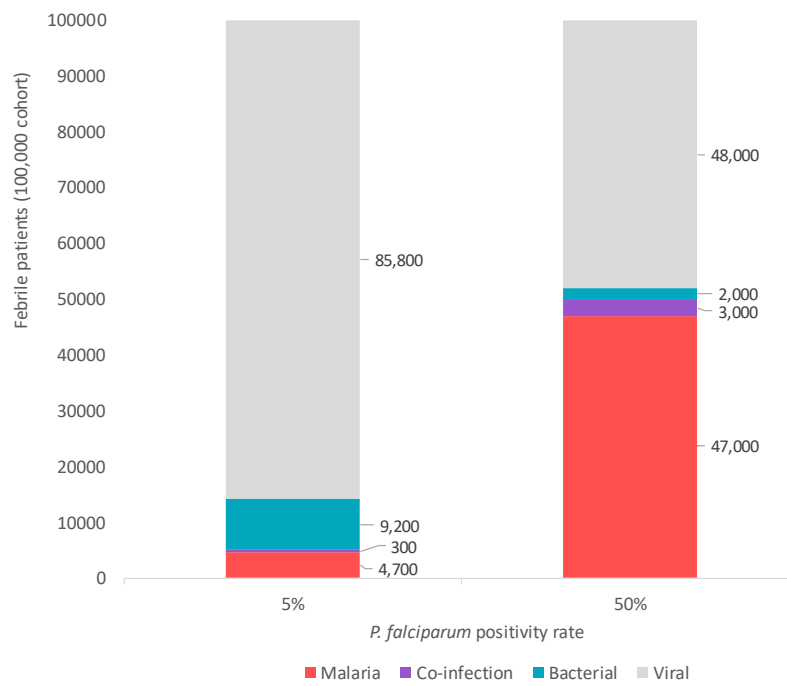

**S4. Initial treatment received by mutually-exclusive treatment categories used in decision-tree model, for three treatment scenarios (TS-N, TS-T, TS-U); base case and four initial treatment sensitivities used for deterministic sensitivity analysis**

Table 3 shows the results of deterministic sensitivity analysis for 15 parameters, including four initial treatment parameters:

- *Positive RDT result gets antimalarial*: varies (by +/- 10 percentage points) the probability that a patient with a positive RDT receives an antimalarial;
- *Antimalarial with positive RDT result that is ACT*: varies (by +/- 10 percentage points) the probability that a patient with a positive RDT and receiving an antimalarial receives an ACT (rather than a non-ACT antimalarial);
- *Negative RDT result gets antibiotic*: varies (by +25/-5 percentage points) the probability that a patient with a negative RDT receives an antibiotic; and
- *Initial treatment parameters for intervention with no test unchanged from control*: varies the probability of receiving a particular treatment for a patient not receiving a test in the intervention arm to match the probabilities of initial treatment for patients in the control arm (i.e. assumes that the introduction of RDTs would not influence the initial treatment received by untested patients in the intervention arm).

The tables below show the probabilities of receiving a particular initial treatment, at base case and for each of the above sensitivities. Initial treatment probabilities are shown as (i) the seven mutually-exclusive treatment categories used in the decision-model (ACT, other antimalarial, ACT + antibiotic, other antimalarial + antibiotic, antibiotic only, other drug, no drug), and (ii) 'summary' categories of the total probabilities of receiving an ACT, other antimalarial, all antimalarial, and antibiotic for the control arm and each test result in the intervention arm. Tables (a), (b), and (c) provide the values for TS-N, TS-T, and TS-U, respectively.

## (a) TS-N(31,37)

|                                                                                                       | Sensitivity:<br>Low/High | Categories in decision-tree |             |        |                  |     |       |      |       | Summary categories |             |            |            |
|-------------------------------------------------------------------------------------------------------|--------------------------|-----------------------------|-------------|--------|------------------|-----|-------|------|-------|--------------------|-------------|------------|------------|
|                                                                                                       |                          | ACT                         | Other<br>AM | ACT+AB | Other<br>AM + AB | AB  | Other | None | Total | ACT                | Other<br>AM | All AM     | AB         |
| <b>Base case</b>                                                                                      |                          |                             |             |        |                  |     |       |      |       |                    |             |            |            |
| Control, no test                                                                                      |                          | 15%                         | 51%         | 3%     | 9%               | 7%  | 10%   | 5%   | 100%  | 18%                | 60%         | 77%        | 19%        |
| Intervention, no test                                                                                 |                          | 41%                         | 31%         | 8%     | 4%               | 1%  | 6%    | 9%   | 100%  | 49%                | 35%         | 84%        | 13%        |
| Intervention, positive test                                                                           |                          | 56%                         | 11%         | 12%    | 1%               | 1%  | 1%    | 19%  | 100%  | 68%                | 11%         | 79%        | 13%        |
| Intervention, negative test                                                                           |                          | 23%                         | 27%         | 5%     | 2%               | 9%  | 15%   | 19%  | 100%  | 27%                | 29%         | 56%        | 16%        |
| <b>Sensitivity: Positive RDT results gets antimalarial (+/- 10%)</b>                                  |                          |                             |             |        |                  |     |       |      |       |                    |             |            |            |
| Intervention, positive test                                                                           | Low (-10%)               | 49%                         | 9%          | 10%    | 0%               | 2%  | 2%    | 27%  | 100%  | 59%                | 10%         | <b>69%</b> | 13%        |
| Intervention, positive test                                                                           | High (+10%)              | 63%                         | 12%         | 14%    | 1%               | 0%  | 1%    | 10%  | 100%  | 77%                | 13%         | <b>89%</b> | 13%        |
| <b>Sensitivity: Antimalarial with positive RDT result that is ACT</b>                                 |                          |                             |             |        |                  |     |       |      |       |                    |             |            |            |
| Intervention, positive test                                                                           | Low (-10%)               | 49%                         | 18%         | 11%    | 1%               | 2%  | 1%    | 18%  | 100%  | <b>60%</b>         | <b>19%</b>  | 79%        | 13%        |
| Intervention, positive test                                                                           | High (+10%)              | 63%                         | 3%          | 13%    | 0%               | 0%  | 1%    | 20%  | 100%  | <b>76%</b>         | <b>3%</b>   | 79%        | 13%        |
| <b>Sensitivity: Negative RDT result gets antibiotic</b>                                               |                          |                             |             |        |                  |     |       |      |       |                    |             |            |            |
| Intervention, negative test                                                                           | Low (-5%)                | 23%                         | 27%         | 5%     | 2%               | 4%  | 17%   | 22%  | 100%  | 27%                | 29%         | 56%        | <b>11%</b> |
| Intervention, negative test                                                                           | High (+25%)              | 23%                         | 27%         | 5%     | 2%               | 34% | 4%    | 5%   | 100%  | 27%                | 29%         | 56%        | <b>41%</b> |
| <b>Sensitivity: Initial treatment parameters for intervention with no test unchanged from control</b> |                          |                             |             |        |                  |     |       |      |       |                    |             |            |            |
| Intervention, no test                                                                                 |                          | 15%                         | 51%         | 3%     | 9%               | 7%  | 10%   | 5%   | 100%  | <b>18%</b>         | <b>60%</b>  | <b>77%</b> | <b>19%</b> |

## (b) TS-T(30,38)

|                                                                                                       | Sensitivity:<br>Low/High | Categories in decision-tree |             |        |                  |     |       |      |       | Summary categories |             |             |            |
|-------------------------------------------------------------------------------------------------------|--------------------------|-----------------------------|-------------|--------|------------------|-----|-------|------|-------|--------------------|-------------|-------------|------------|
|                                                                                                       |                          | ACT                         | Other<br>AM | ACT+AB | Other<br>AM + AB | AB  | Other | None | Total | ACT                | Other<br>AM | All AM      | AB         |
| <b>Base case</b>                                                                                      |                          |                             |             |        |                  |     |       |      |       |                    |             |             |            |
| Control, no test                                                                                      |                          | 34%                         | 28%         | 7%     | 3%               | 6%  | 19%   | 4%   | 100%  | 41%                | 31%         | 72%         | 15%        |
| Intervention, no test                                                                                 |                          | 28%                         | 33%         | 9%     | 4%               | 4%  | 17%   | 4%   | 100%  | 37%                | 38%         | 75%         | 17%        |
| Intervention, positive test                                                                           |                          | 67%                         | 13%         | 8%     | 1%               | 1%  | 2%    | 7%   | 100%  | 75%                | 14%         | 90%         | 10%        |
| Intervention, negative test                                                                           |                          | 3%                          | 4%          | 0%     | 0%               | 9%  | 42%   | 42%  | 100%  | 3%                 | 4%          | 7%          | 9%         |
| <b>Sensitivity: Positive RDT results gets antimalarial (+/- 10%)</b>                                  |                          |                             |             |        |                  |     |       |      |       |                    |             |             |            |
| Intervention, positive test                                                                           | Low (-10%)               | 60%                         | 12%         | 7%     | 1%               | 2%  | 4%    | 14%  | 100%  | 67%                | 13%         | <b>80%</b>  | 10%        |
| Intervention, positive test                                                                           | High (+10%)              | 74%                         | 15%         | 9%     | 1%               | 0%  | 0%    | 0%   | 100%  | 84%                | 16%         | <b>100%</b> | 10%        |
| <b>Sensitivity: Antimalarial with positive RDT result that is ACT</b>                                 |                          |                             |             |        |                  |     |       |      |       |                    |             |             |            |
| Intervention, positive test                                                                           | Low (-10%)               | 59%                         | 22%         | 7%     | 2%               | 1%  | 2%    | 7%   | 100%  | <b>66%</b>         | <b>23%</b>  | 90%         | 10%        |
| Intervention, positive test                                                                           | High (+10%)              | 75%                         | 5%          | 9%     | 0%               | 1%  | 2%    | 7%   | 100%  | <b>84%</b>         | <b>5%</b>   | 90%         | 10%        |
| <b>Sensitivity: Negative RDT result gets antibiotic</b>                                               |                          |                             |             |        |                  |     |       |      |       |                    |             |             |            |
| Intervention, negative test                                                                           | Low (-5%)                | 3%                          | 4%          | 0%     | 0%               | 4%  | 45%   | 44%  | 100%  | 3%                 | 4%          | 7%          | <b>4%</b>  |
| Intervention, negative test                                                                           | High (+25%)              | 3%                          | 4%          | 0%     | 0%               | 34% | 30%   | 29%  | 100%  | 3%                 | 4%          | 7%          | <b>34%</b> |
| <b>Sensitivity: Initial treatment parameters for intervention with no test unchanged from control</b> |                          |                             |             |        |                  |     |       |      |       |                    |             |             |            |
| Intervention, no test                                                                                 |                          | 34%                         | 28%         | 7%     | 3%               | 6%  | 19%   | 4%   | 100%  | <b>41%</b>         | <b>31%</b>  | <b>72%</b>  | <b>15%</b> |



## (c) TS-U(28,36)

|                                                                                                       | Sensitivity:<br>Low/High | Categories in decision-tree |             |        |                  |     |       |      |       | Summary categories |             |            |            |
|-------------------------------------------------------------------------------------------------------|--------------------------|-----------------------------|-------------|--------|------------------|-----|-------|------|-------|--------------------|-------------|------------|------------|
|                                                                                                       |                          | ACT                         | Other<br>AM | ACT+AB | Other<br>AM + AB | AB  | Other | None | Total | ACT                | Other<br>AM | All AM     | AB         |
| <b>Base case</b>                                                                                      |                          |                             |             |        |                  |     |       |      |       |                    |             |            |            |
| Control, no test                                                                                      |                          | 25%                         | 26%         | 8%     | 19%              | 10% | 13%   | 0%   | 100%  | 32%                | 45%         | 77%        | 37%        |
| Intervention, no test                                                                                 |                          | 24%                         | 19%         | 8%     | 11%              | 13% | 26%   | 0%   | 100%  | 32%                | 30%         | 61%        | 31%        |
| Intervention, positive test                                                                           |                          | 30%                         | 25%         | 11%    | 18%              | 3%  | 9%    | 4%   | 100%  | 41%                | 42%         | 83%        | 31%        |
| Intervention, negative test                                                                           |                          | 15%                         | 13%         | 2%     | 15%              | 19% | 23%   | 15%  | 100%  | 17%                | 27%         | 44%        | 35%        |
| <b>Sensitivity: Positive RDT results gets antimalarial (+/- 10%)</b>                                  |                          |                             |             |        |                  |     |       |      |       |                    |             |            |            |
| Intervention, positive test                                                                           | Low (-10%)               | 27%                         | 22%         | 10%    | 15%              | 6%  | 14%   | 6%   | 100%  | 36%                | 37%         | <b>73%</b> | 31%        |
| Intervention, positive test                                                                           | High (+10%)              | 34%                         | 28%         | 12%    | 20%              | 0%  | 5%    | 2%   | 100%  | 46%                | 47%         | <b>93%</b> | 31%        |
| <b>Sensitivity: Antimalarial with positive RDT result that is ACT</b>                                 |                          |                             |             |        |                  |     |       |      |       |                    |             |            |            |
| Intervention, positive test                                                                           | Low (-10%)               | 24%                         | 30%         | 9%     | 21%              | 2%  | 10%   | 5%   | 100%  | <b>33%</b>         | <b>51%</b>  | 83%        | 31%        |
| Intervention, positive test                                                                           | High (+10%)              | 36%                         | 20%         | 13%    | 14%              | 4%  | 9%    | 4%   | 100%  | <b>49%</b>         | <b>34%</b>  | 83%        | 31%        |
| <b>Sensitivity: Negative RDT result gets antibiotic</b>                                               |                          |                             |             |        |                  |     |       |      |       |                    |             |            |            |
| Intervention, negative test                                                                           | Low (-5%)                | 15%                         | 13%         | 2%     | 15%              | 14% | 26%   | 17%  | 100%  | 17%                | 27%         | 44%        | <b>30%</b> |
| Intervention, negative test                                                                           | High (+25%)              | 15%                         | 13%         | 2%     | 15%              | 44% | 8%    | 5%   | 100%  | 17%                | 27%         | 44%        | <b>60%</b> |
| <b>Sensitivity: Initial treatment parameters for intervention with no test unchanged from control</b> |                          |                             |             |        |                  |     |       |      |       |                    |             |            |            |
| Intervention, no test                                                                                 |                          | 25%                         | 26%         | 8%     | 19%              | 10% | 13%   | 0%   | 100%  | <b>32%</b>         | <b>45%</b>  | <b>77%</b> | <b>37%</b> |

**S5. Supporting intervention costs: parameters of introducing subsidised malaria RDTs in the private retail sector (2017 USD)\***

| Parameter                                                                            | Value                   | Source(s)       |
|--------------------------------------------------------------------------------------|-------------------------|-----------------|
| Community sensitisation, per patient (USD)                                           | 0.17                    | (18)            |
| Retailer training, per patient (USD)                                                 | 0.85                    | (18)            |
| Retailer supervision, per patient (USD)                                              | 0.70                    | (18)            |
| Waste collection, per patient (USD)                                                  | 0.70                    | Assumption      |
| <b>Total supporting intervention costs, per patient (USD)</b>                        | <b>2.42</b>             |                 |
| Number of patients per day                                                           | 0.8                     | (29)            |
| Adjusted number of patients per day                                                  | 5.0                     | Assumption      |
| Overhead (%)                                                                         | 5%                      | Assumption      |
| <b>Adjusted supporting intervention costs, per patient, including overhead (USD)</b> | <b>0.43 (0.21-0.64)</b> | (Range +/- 50%) |

\* All costs were adjusted to 2017 US dollars using the median of the five year annual average GDP deflator in the six countries participating in the Private Sector Co-payment Mechanism(69).

**S6. Incremental deaths averted for 100,000 febrile patients in three private retail sector treatment scenarios (TS-N, TS-T, TS-U), at 5% and 50% PfPR**

|                                                           | 5% PfPR  |           |            | 50% PfPR  |           |            |
|-----------------------------------------------------------|----------|-----------|------------|-----------|-----------|------------|
|                                                           | TS-N     | TS-T      | TS-U       | TS-N      | TS-T      | TS-U       |
| <i>Incremental final health outcomes – deaths averted</i> |          |           |            |           |           |            |
| <i>P. falciparum</i> malaria                              | 23       | 17        | -13        | 43        | 33        | -26        |
| Bacterial                                                 | -19      | -3        | -13        | -4        | -1        | -3         |
| Viral                                                     | -        | -         | -          | -         | -         | -          |
| Co-infection                                              | -        | -         | -          | 2         | 3         | -4         |
| <b>All febrile illness</b>                                | <b>4</b> | <b>14</b> | <b>-27</b> | <b>41</b> | <b>36</b> | <b>-32</b> |

**S7. Deterministic sensitivity of net monetary benefit, health service perspective, at cost-effectiveness thresholds for Madagascar (\$84) and Kenya (\$630), to changes in *P. falciparum* positivity rate (0-90%), across three treatment scenarios (TS-N, TS-T, TS-U) (2017 USD)**

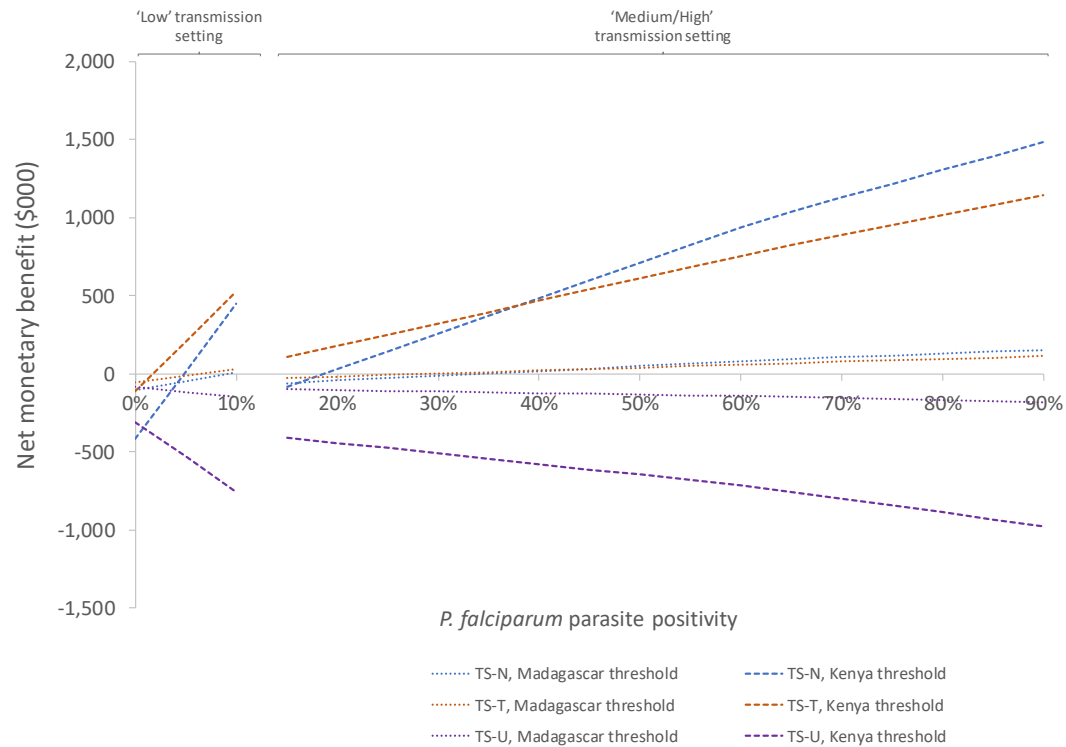

The light-dash lines show net monetary benefit (NMB) for each of the three treatment scenarios, calculated using a cost-effectiveness threshold for Madagascar (\$84), across a range of the *P. falciparum* positivity rate (PfPR). The heavy-dash lines show NMB for the treatment scenarios using a cost-effectiveness threshold for Kenya (\$630).

**S8. Probabilistic sensitivity (10,000 simulations) of incremental health service costs and incremental DALYs averted; at (a) 5% PfPR and (b) 50% PfPR (2017 USD)****(a)**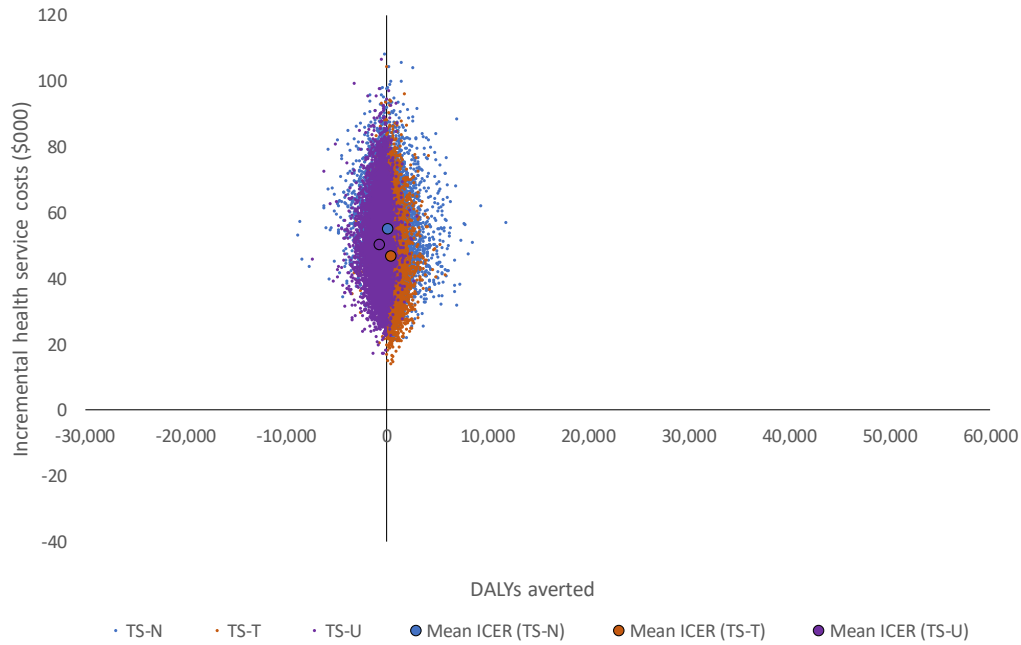**(b)**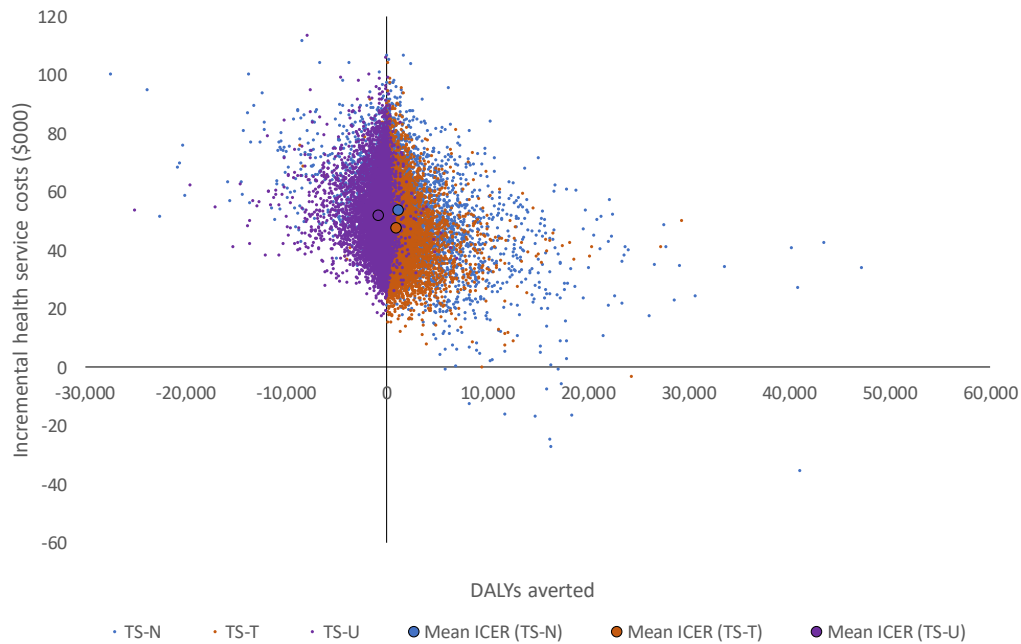

Each small dot represents one of the 10,000 simulations, for each of the three treatment scenarios, in each transmission setting. The large dots show the mean ICER for each treatment scenario.
